# Supplementary material for: Nelumbo nucifera leaf polyphenol extract and gallic acid inhibit TNF-α-induced vascular smooth muscle cell proliferation and migration involving the regulation of miR-21, miR-143 and miR-145
Source: Royal Society of Chemistry journal article supplement (doi:10.1039/d0fo02135k), 2020-01-01
Supplement: d0fo02135k1.pdf [file d0fo02135k1.pdf]

## Supporting information

### The cytotoxicity effect of NLPE or GA in TNF- $\alpha$ -induced VSMC

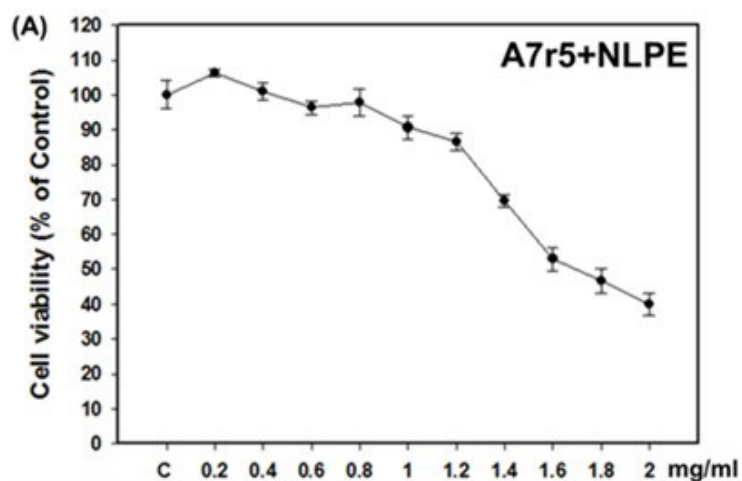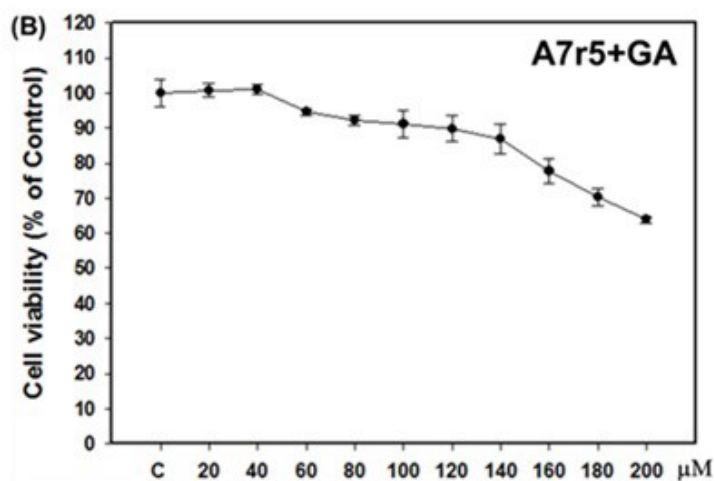

A7r5 cells were treated with various concentrations of A, NLPE or B, GA, as indicated. Cell viability was determined by MTT assay. The results are presented as the mean  $\pm$  SD of three independent experiments.
